# Supplementary material for: From model to crop: functional characterization of SPL8 in M. truncatula led to genetic improvement of biomass yield and abiotic stress tolerance in alfalfa
Source: PubMed Central journal article supplement (PMC5866946; doi:10.1111/pbi.12841), 2017-10-17
Supplement: PBI-16-951-s001.pdf [file PBI-16-951-s001.pdf]

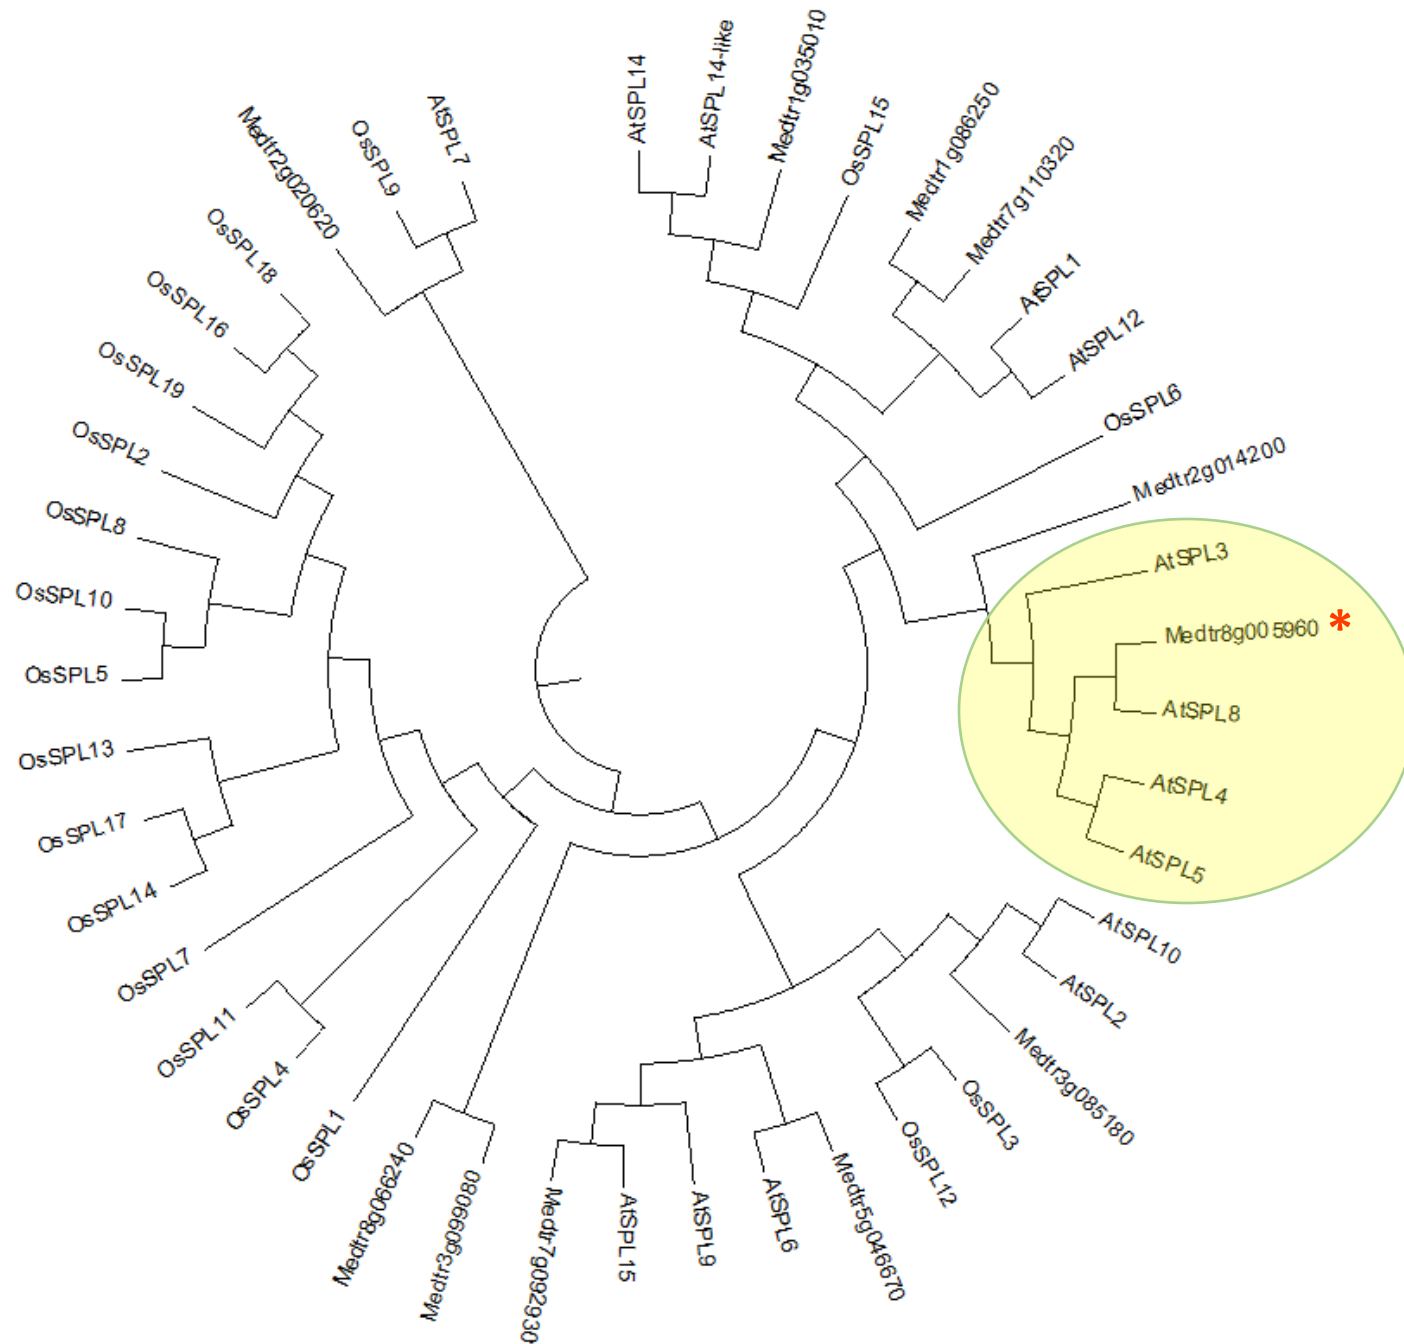

**Figure S1.** Phylogenetic analysis of SPL orthologs in *Arabidopsis*, rice and *M. truncatula*. The analysis indicated that *M. truncatula* SPL8 (*Medtr8g005960*, red star) is a homolog of AtSPL8 and is also close to AtSPL3, 4 and 5.

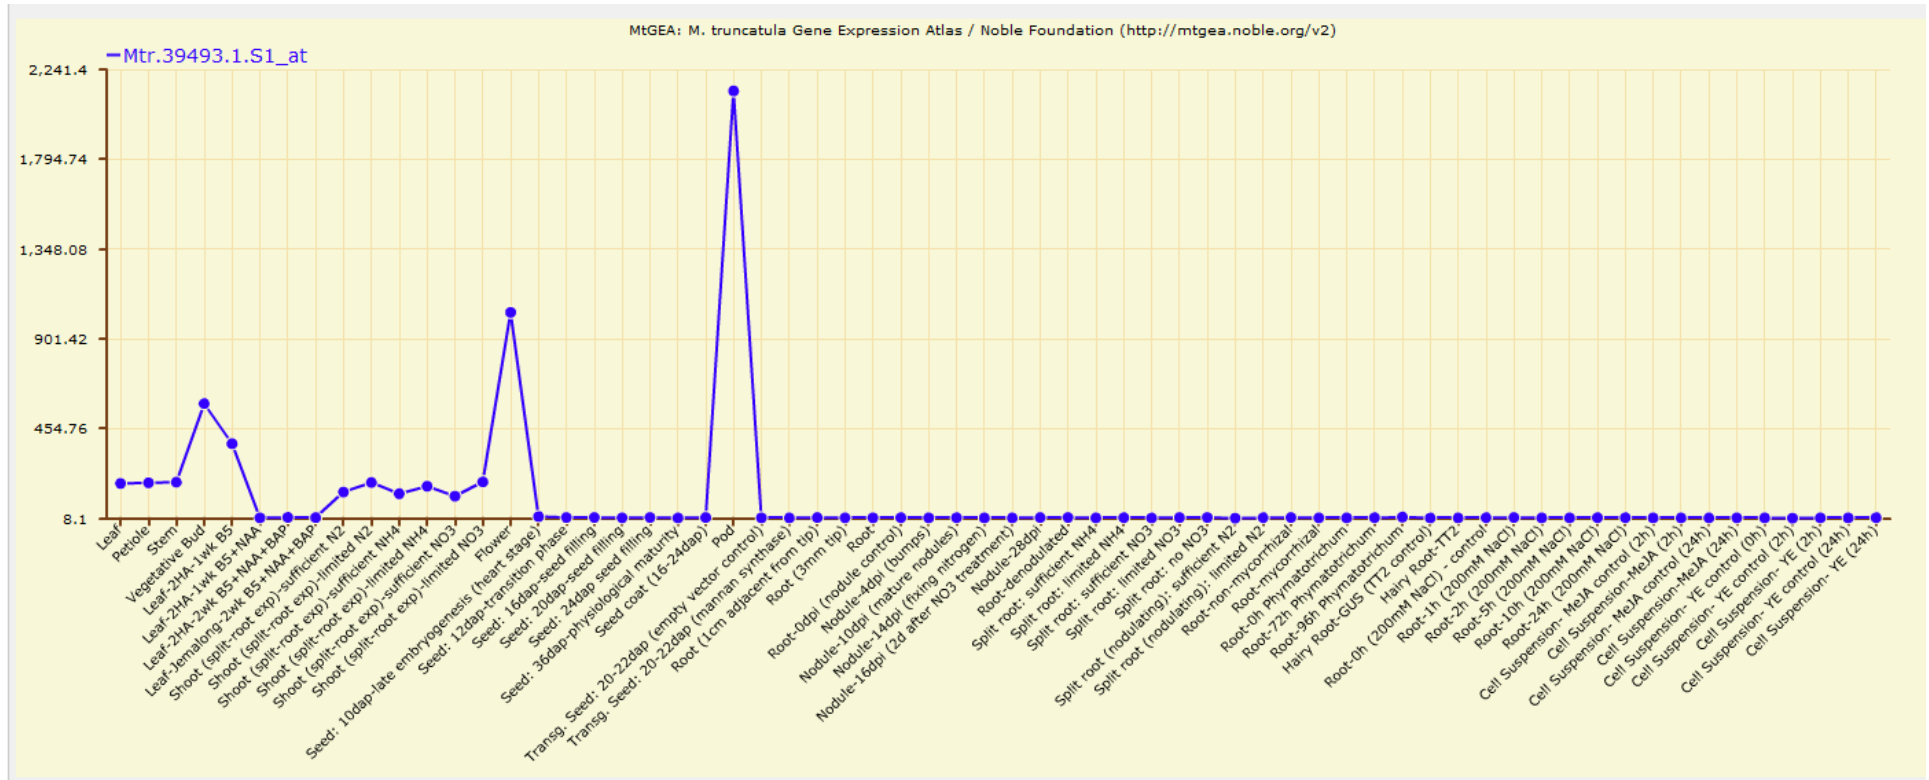

**Figure S2.** Expression patterns of *SPL8* in *M. truncatula*, produced from the *M. truncatula* Gene Expression Atlas (<https://mtgea.noble.org/v2/index.php>).

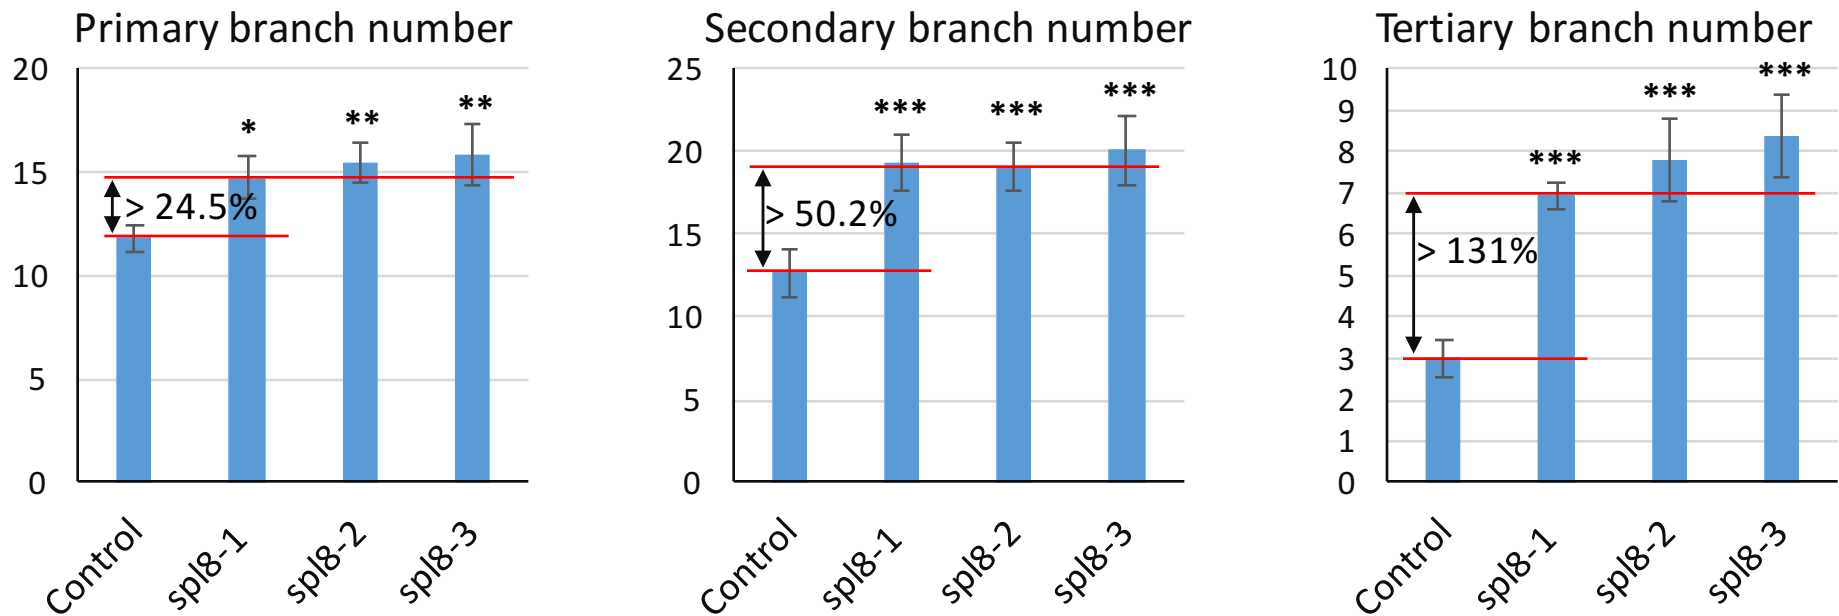

**Figure S3.** Comparison of branch development between control and the three *Tnt1* mutants of *SPL8* in *M. truncatula*. Values represent means  $\pm$  S.D. of three biological replicates and are analyzed by Student's t-test (\*  $P < 0.05$ , \*\*  $P < 0.01$ , \*\*\*  $P < 0.001$ ).

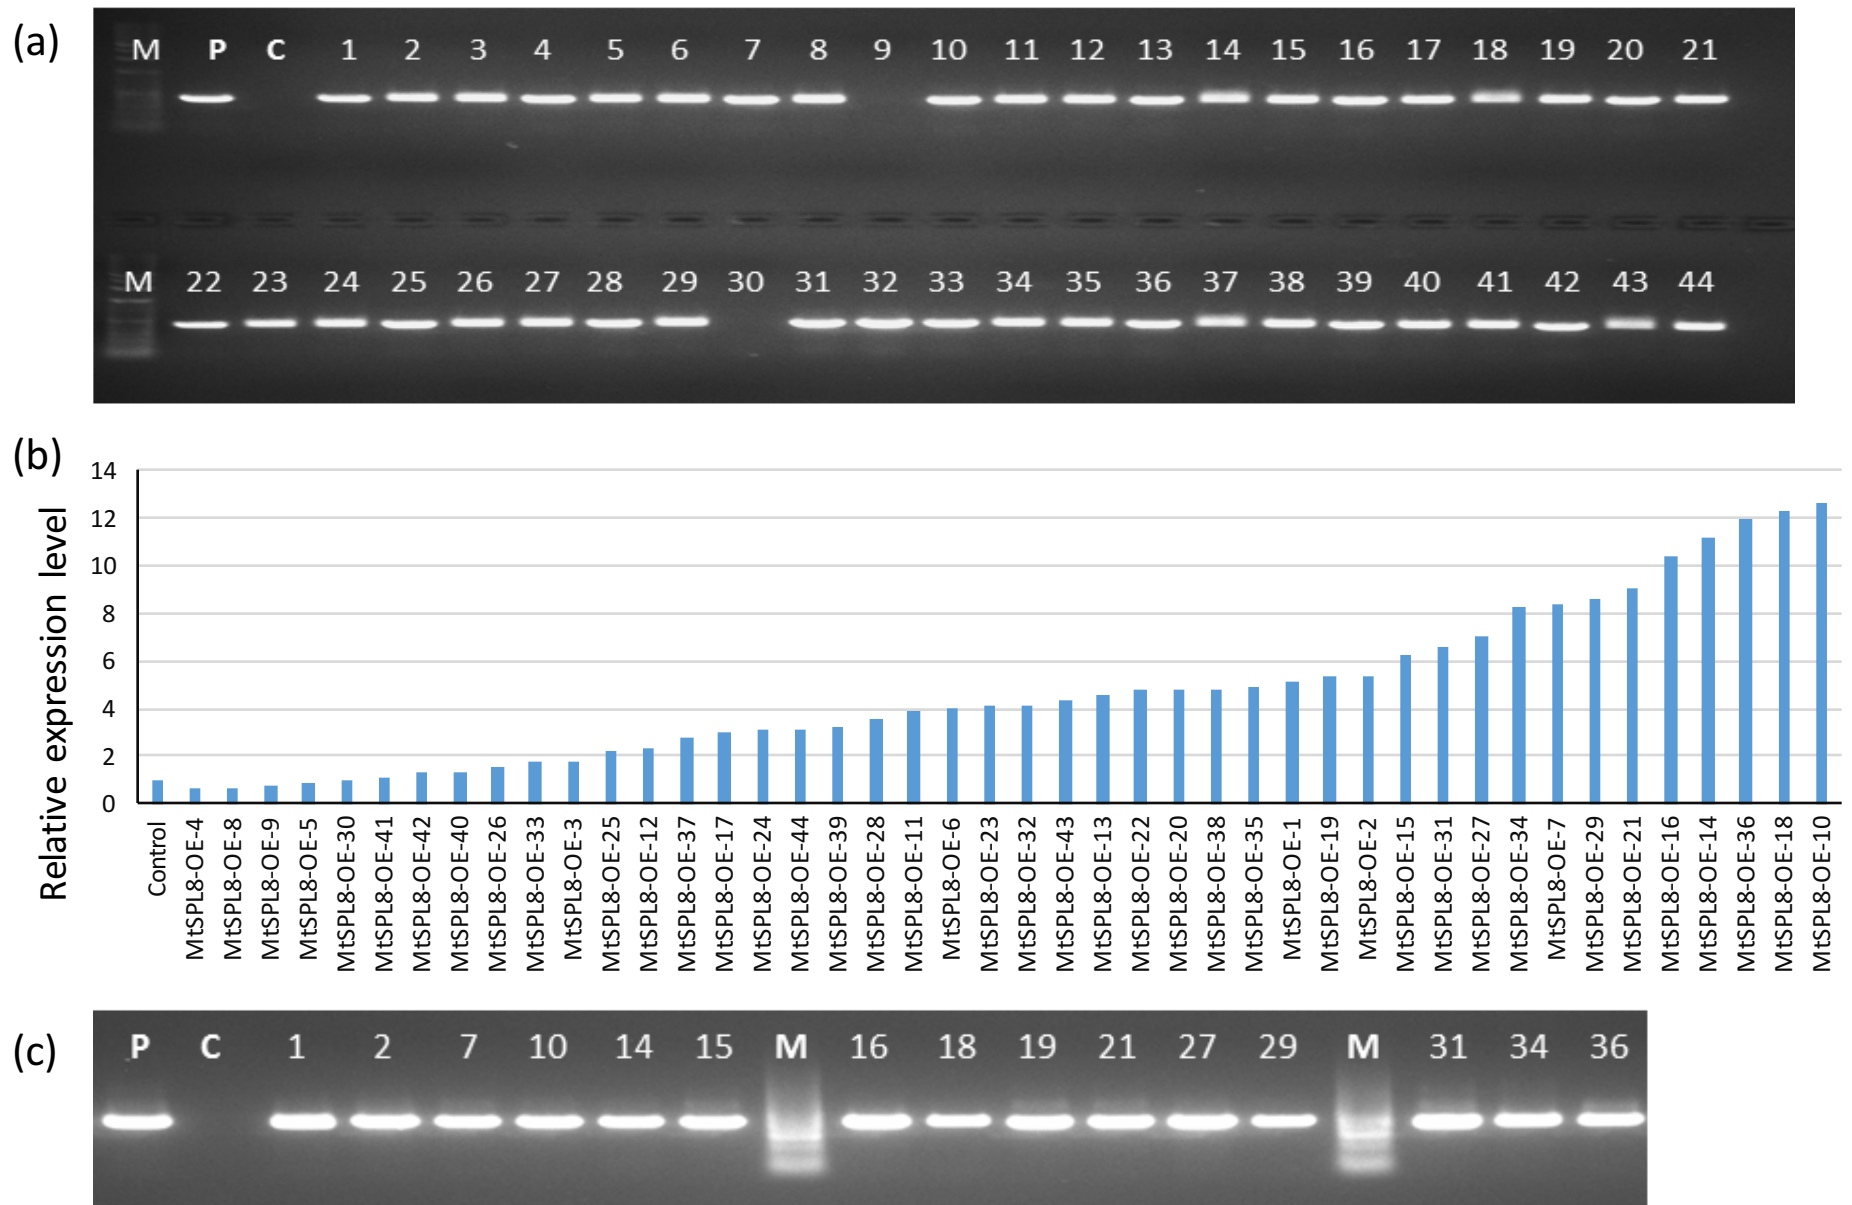

**Figure S4.** PCR analysis of regenerated *M. truncatula* plants after *Agrobacterium*-mediated transformation with the *SPL8* overexpression vector. (a) PCR screening of regenerated T0 plants using promoter and target gene-specific primers. (b) Relative expression levels of *SPL8* in the transgenic plants. Expression is shown relative to that of the control, which is set to 1. (c) PCR verification of 15 T1 transgenic plants. C, wild-type control; M, PCR 50-2,000bp marker (Sigma); P, plasmid DNA as positive control. Numbers represent individual regenerated plants.



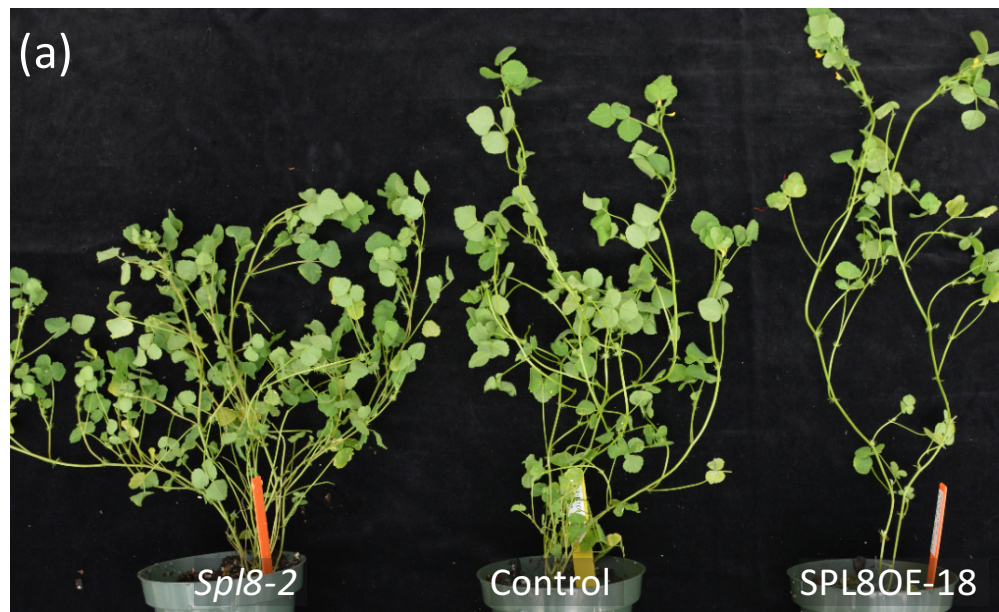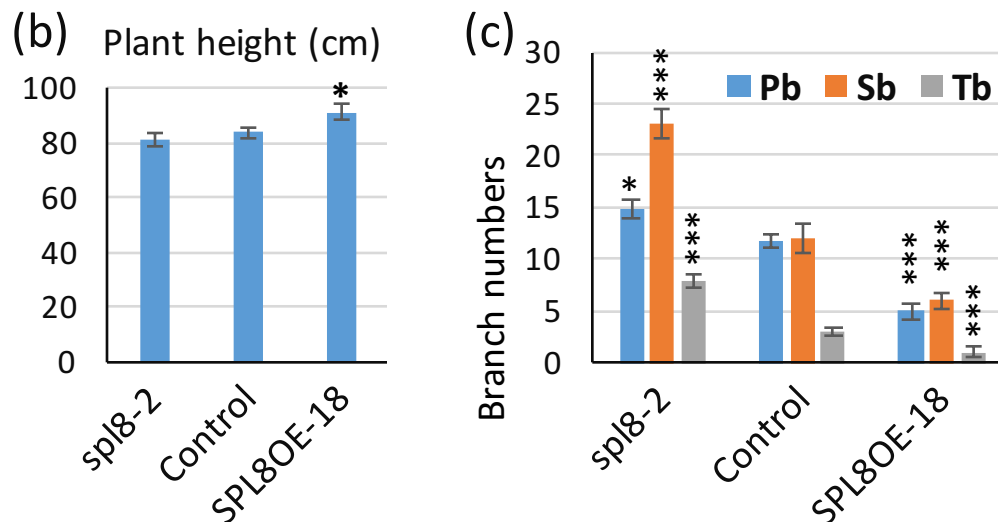

**Figure S5.** Branching and shoot architecture were significantly altered in *SPL8* knockout mutants and overexpression transgenics in *M. truncatula*. (a) Two-month-old plants of *SPL8* knockout mutant (*spl8-2*), control and overexpression transgenics (SPL8OE-18). (b) Plant height of *spl8-2*, control and SPL8OE-18. (c) Total number of various branches that are produced in each main stem. Pb, primary branch. Sb, secondary branch. Tb, tertiary branch. Values represent means  $\pm$  S.D. of three biological replicates and are analyzed by Student's t-test (\*  $P < 0.05$ , \*\*\*  $P < 0.001$ ).

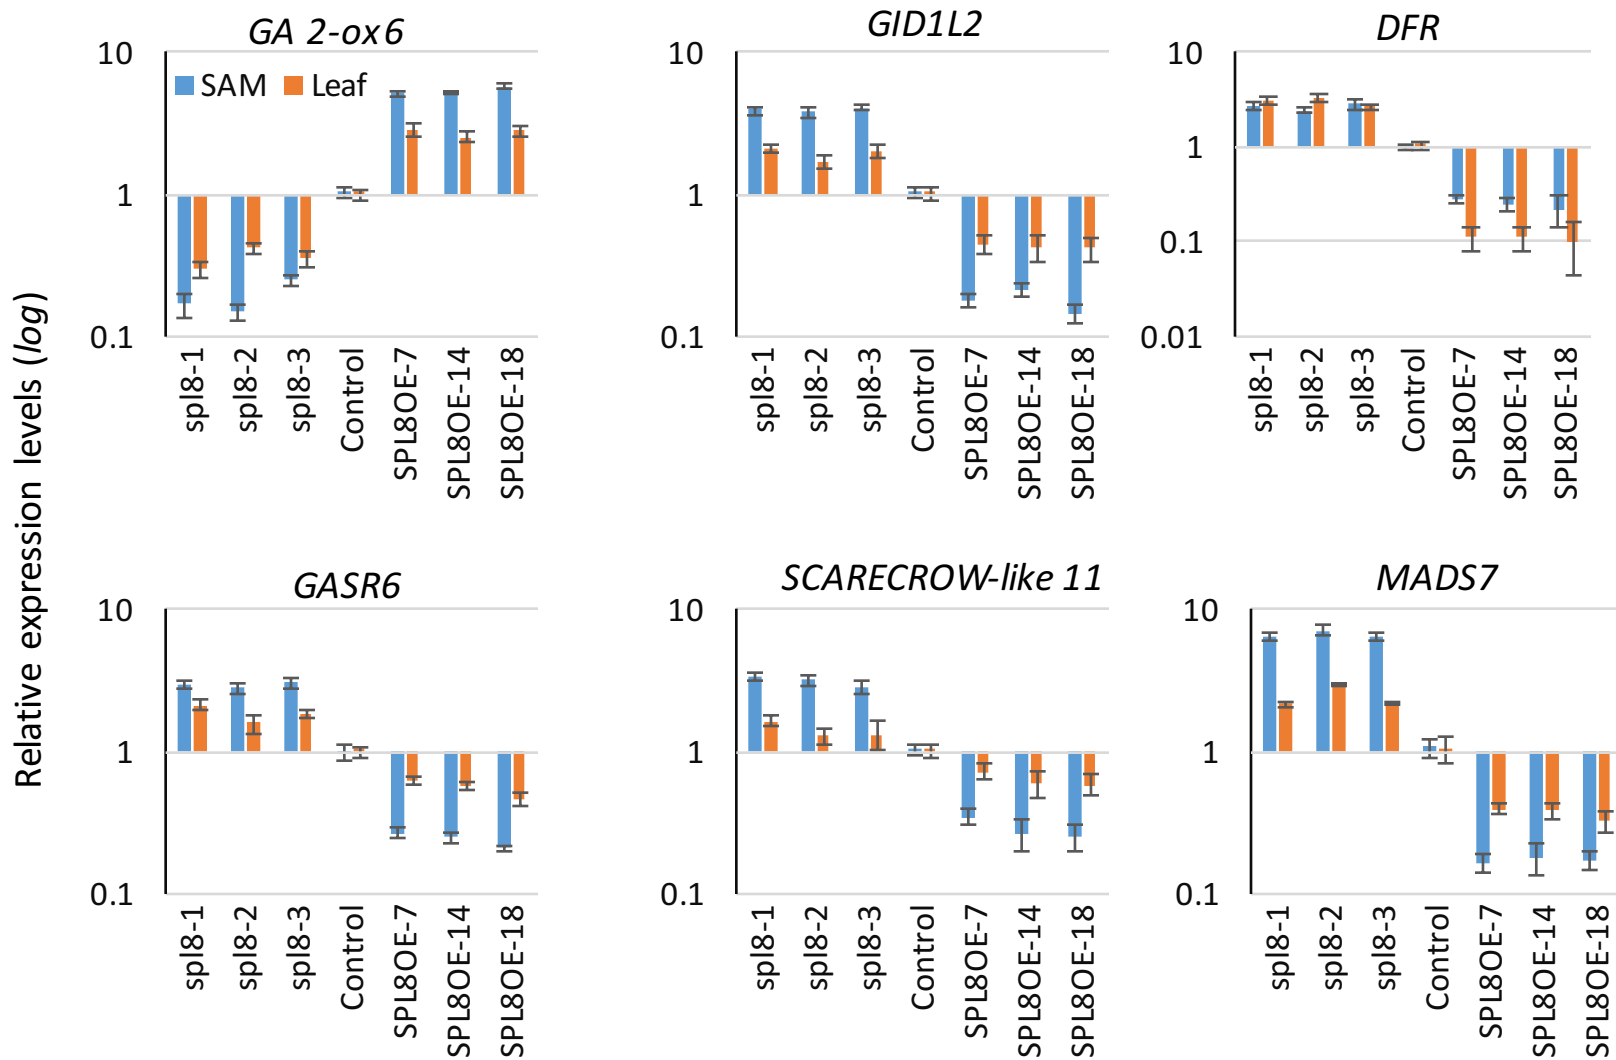

**Figure S6.** Relative expression levels of candidate genes in *spl8* mutants, control and *SPL8* overexpression lines (SPL8OE) in *M. truncatula*. Values represent means  $\pm$  S.D. of three biological replicates.

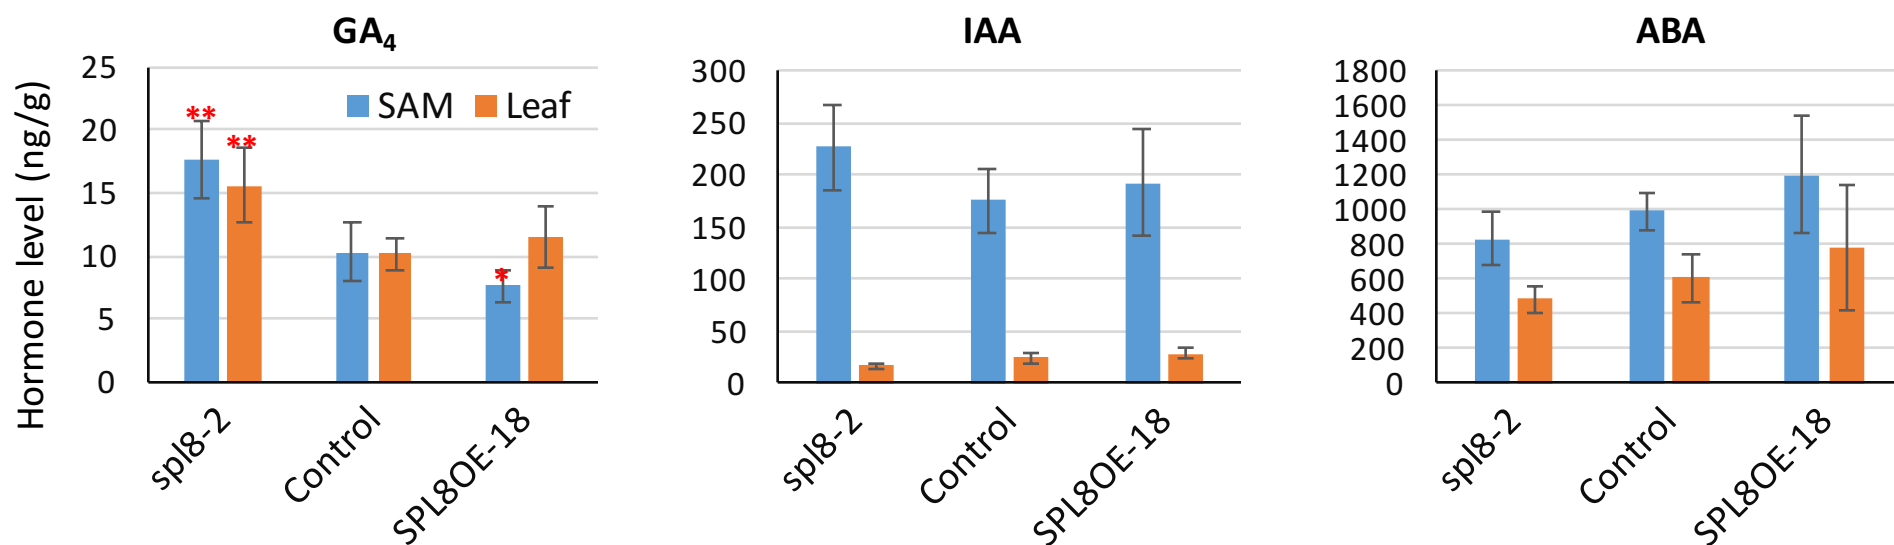

**Figure S7.** Phytohormone accumulation in *spl8* mutants, control and *SPL8* overexpression lines (SPL8OE). Values represent means  $\pm$  S.D. of five biological replicates and are analyzed by Student's t-test (\*  $P < 0.05$ , \*\*  $P < 0.01$ ).

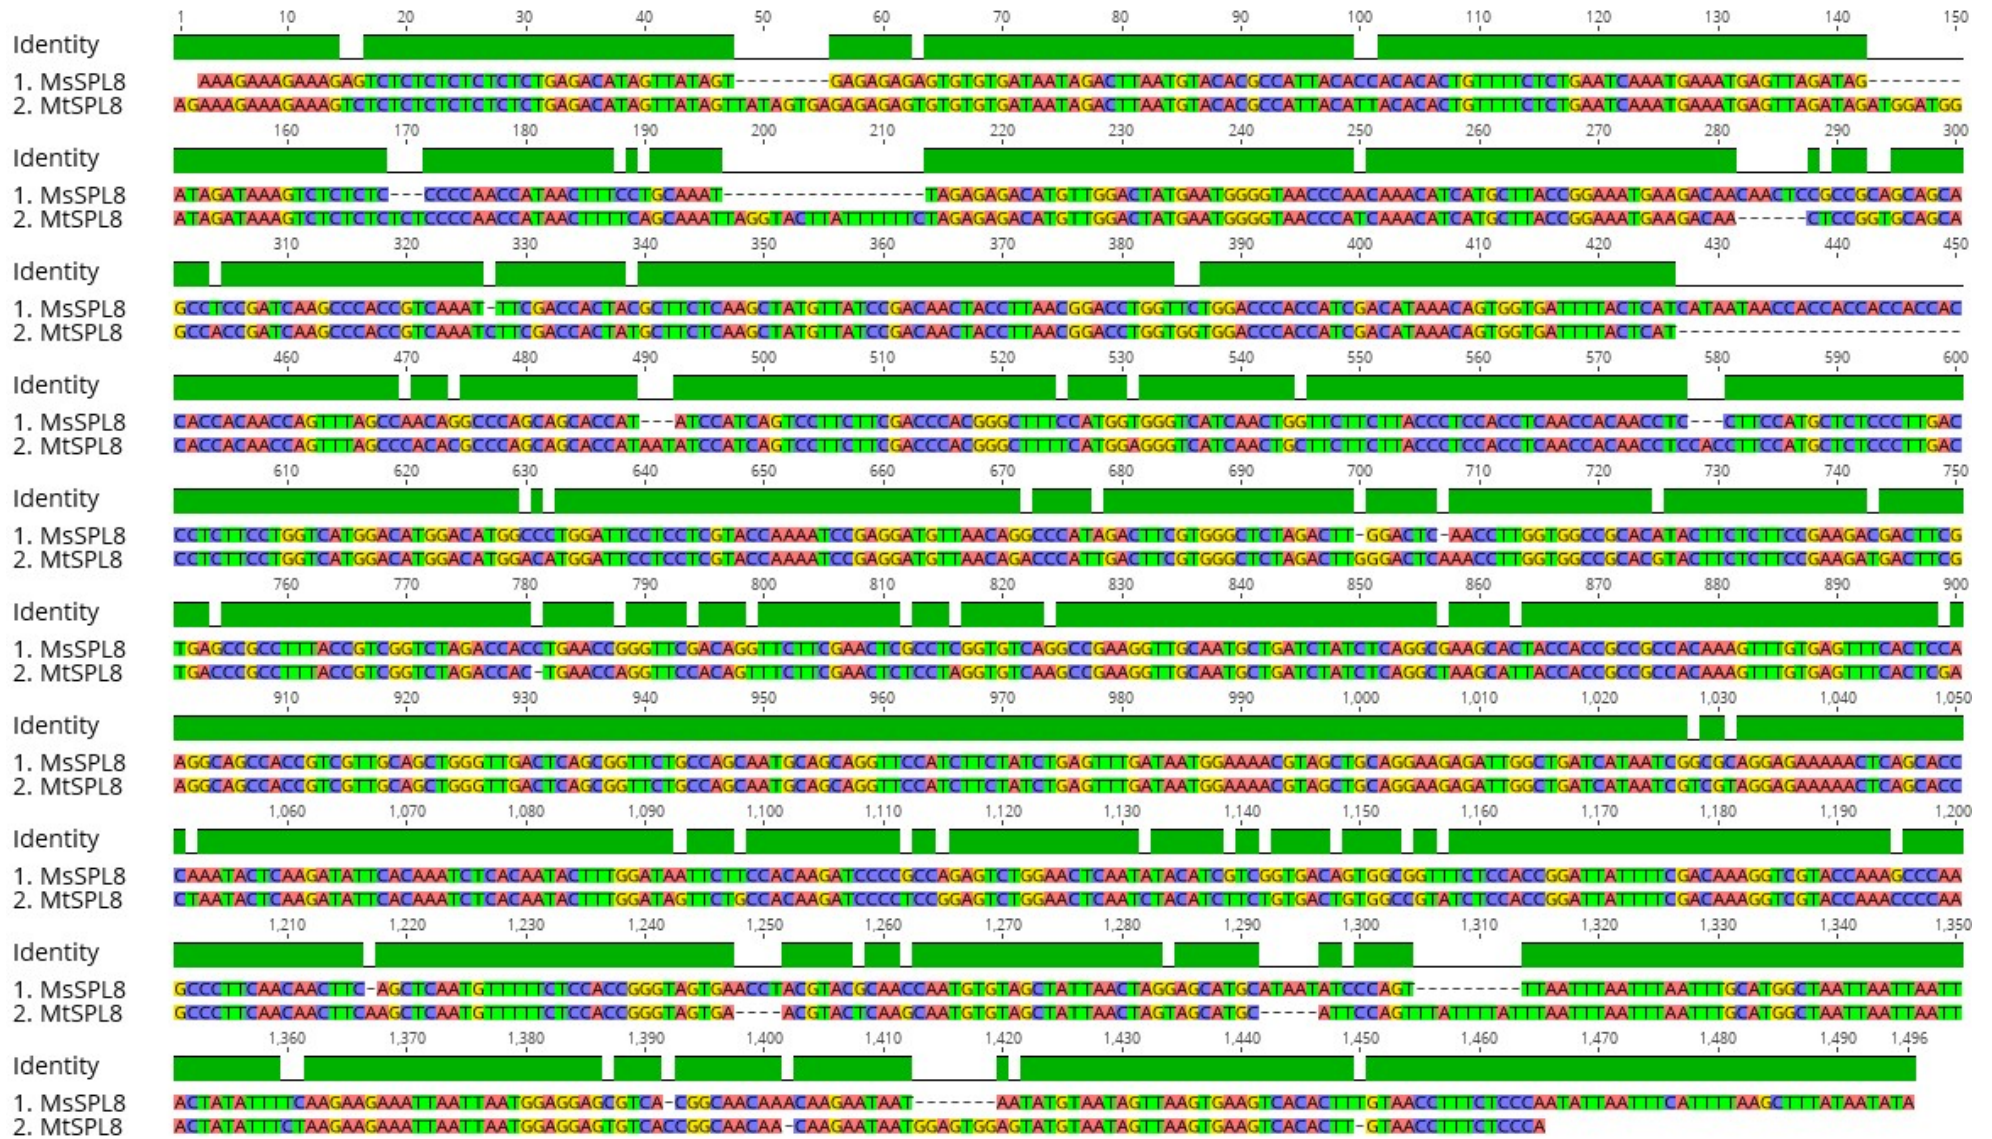

**Figure S8.** Sequence comparison of *MsSPL8* (*M. sativa* SY4D) with *SPL8* (*M. truncatula* R108).



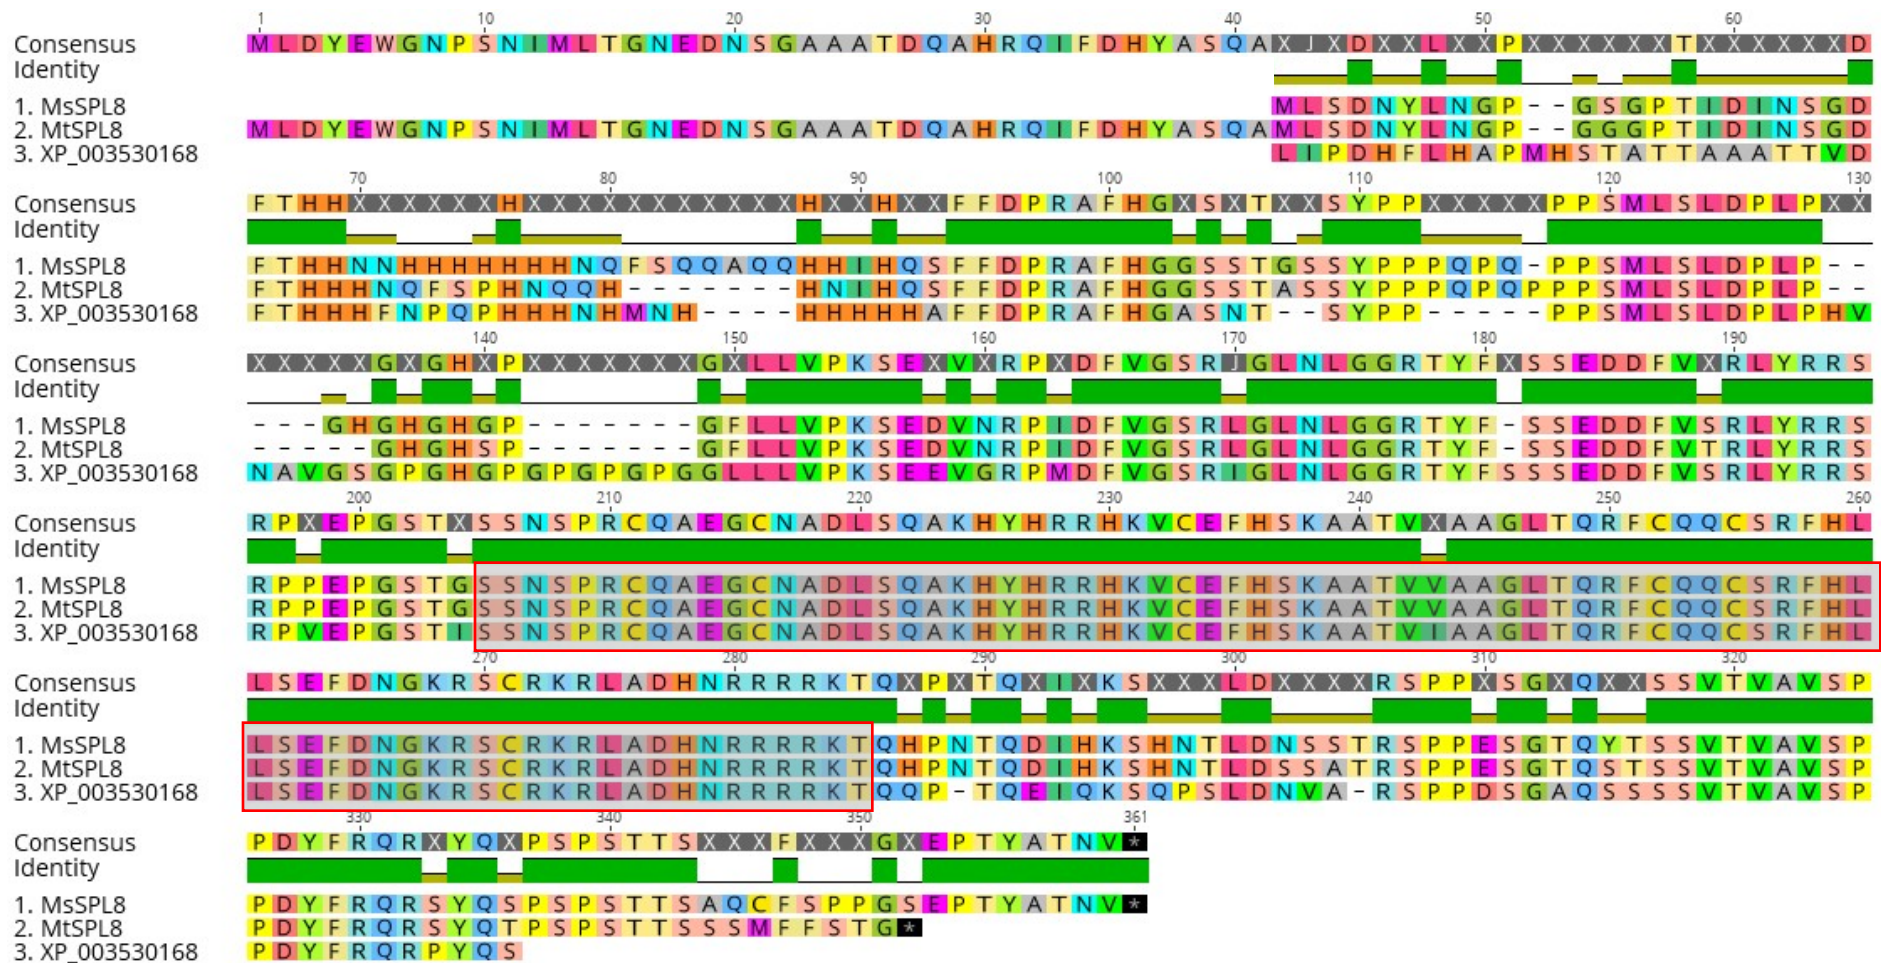

**Figure S9.** Amino acid alignment of MsSPL8 and SPL8 proteins and their ortholog in soybean (*Glycine max*). The red box highlights the SBP domain (206-285). *M. truncatula* SPL8 and MsSPL8 have 89.9% similarity.

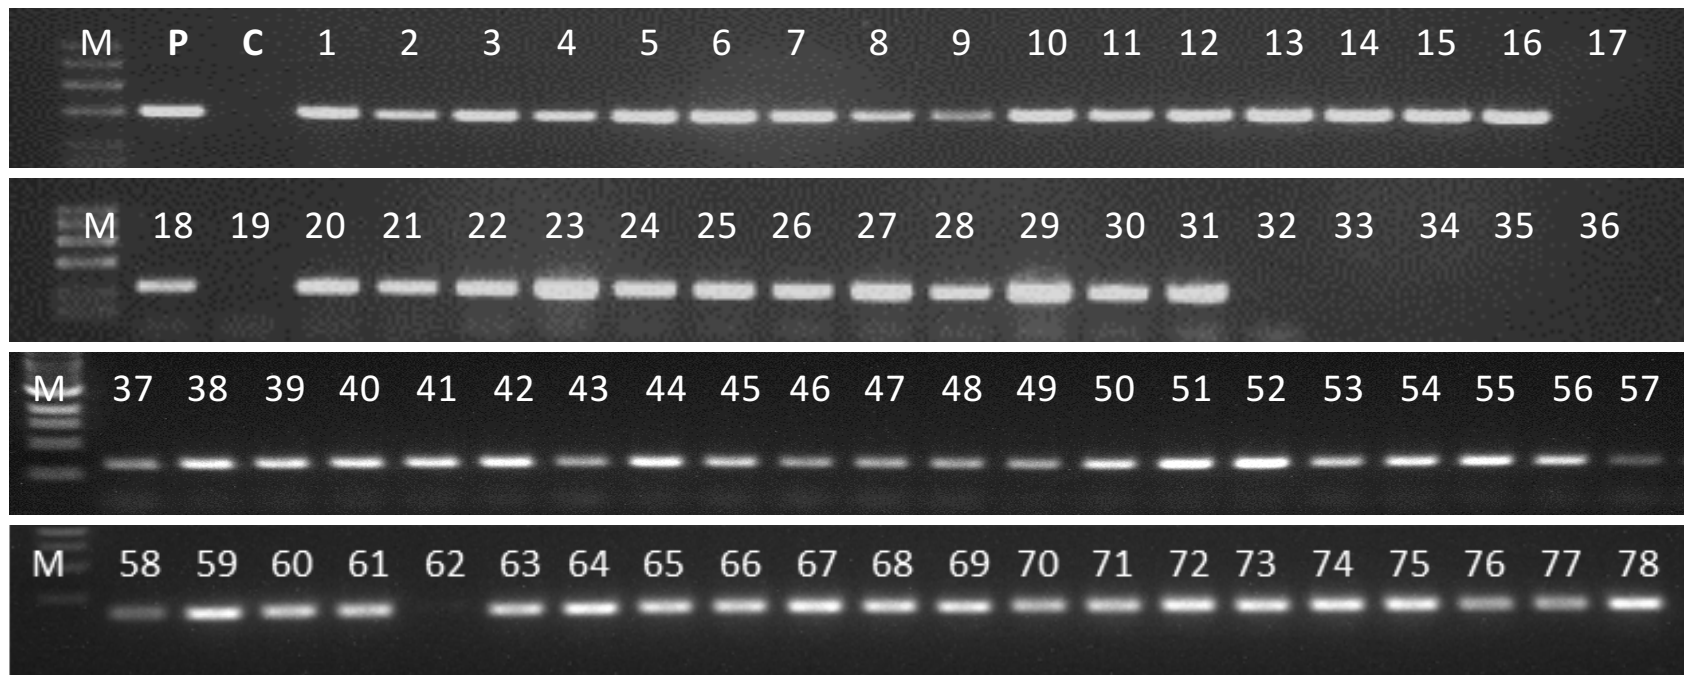

**Figure S10.** PCR analysis of regenerated alfalfa plants after *Agrobacterium*-mediated transformation with the *MsSPL8* RNAi vector. A pair of promoter and target gene-specific primers were used for PCR analysis. C, wild-type control; M, PCR 50-2,000bp marker (Sigma); P, plasmid DNA as positive control. Numbers represent individual regenerated plants.

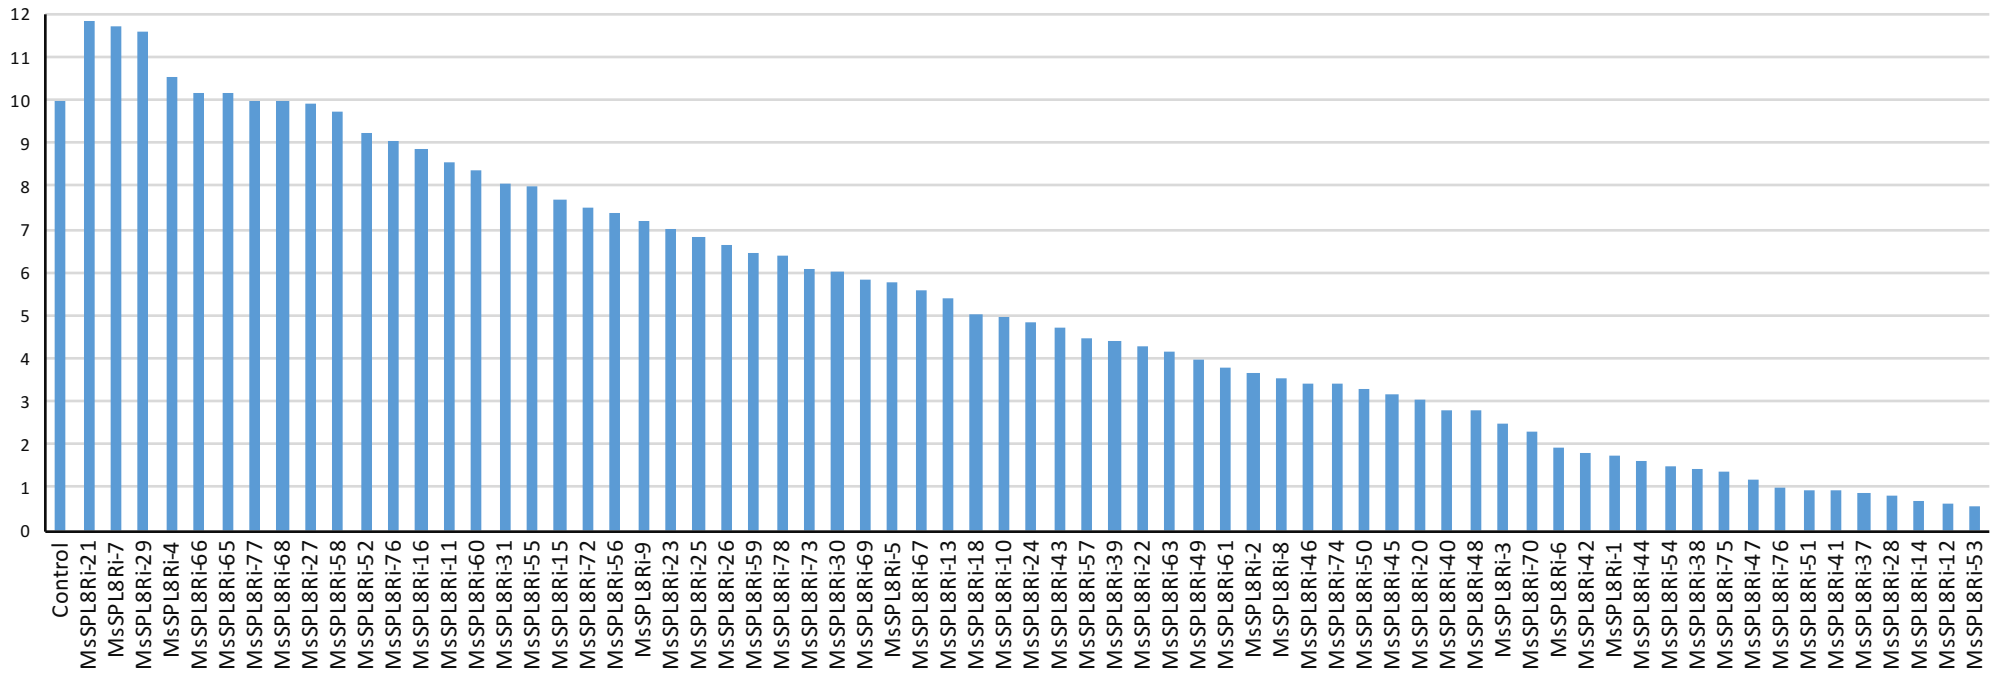

**Figure S11.** Relative expression levels of *MsSPL8* in the transgenic downregulation plants of alfalfa (*MsSPL8Ri*). Expression is shown relative to that of the control, which is set to 1.



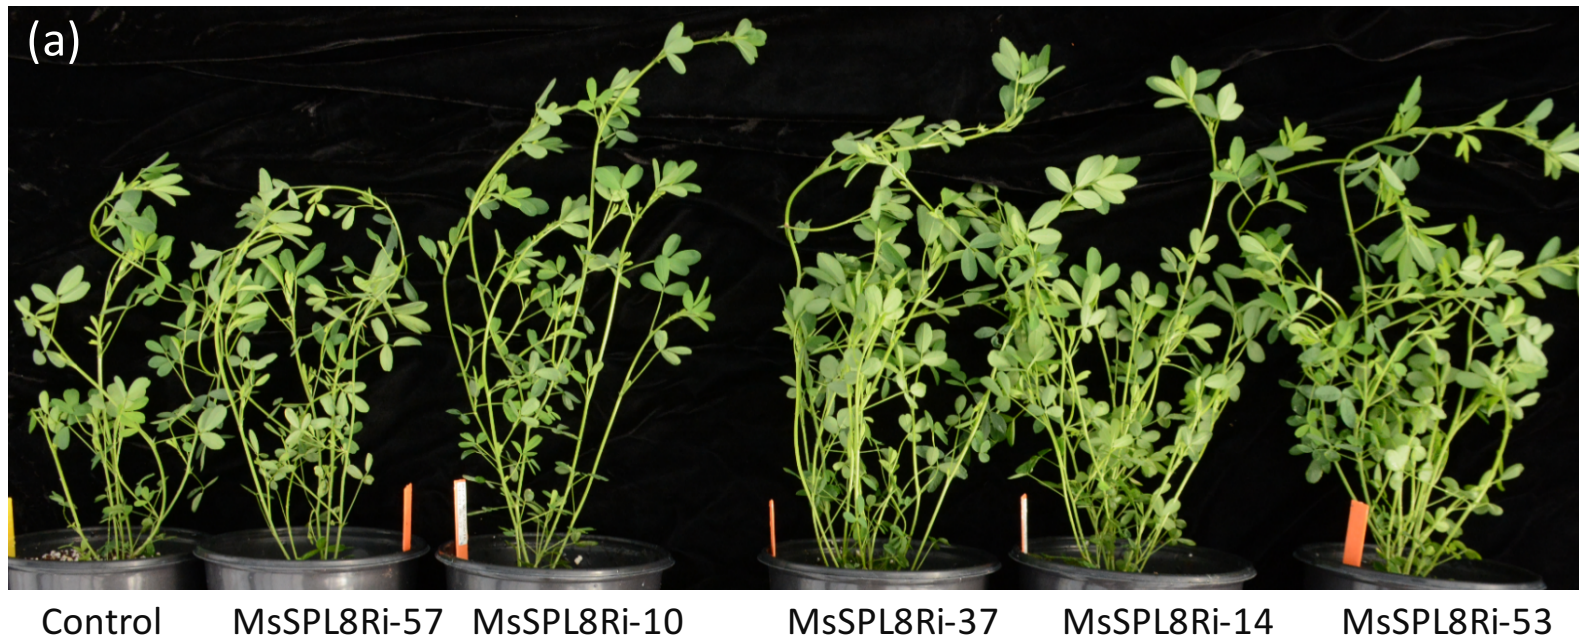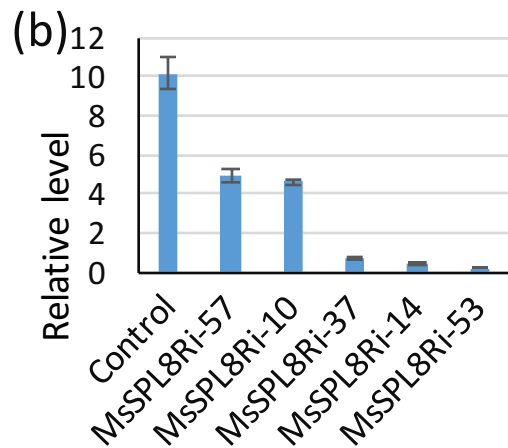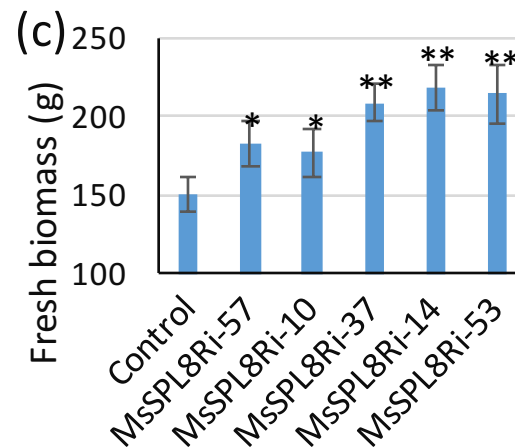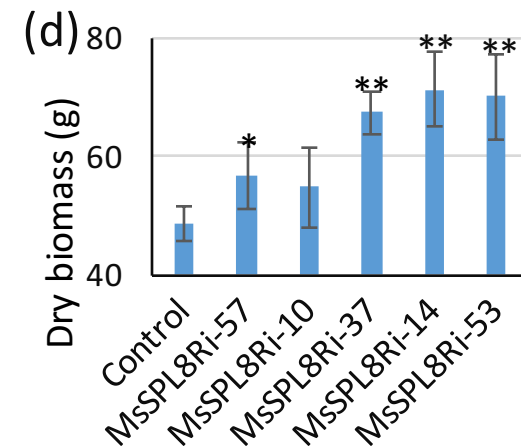

**Figure S12.** Transgenic alfalfa showing increased biomass phenotype with downregulation of *MsSPL8*. (a) Mature plants of control and *MsSPL8* downregulation transgenics (MsSPL8Ri). (b) *MsSPL8* relative expression levels. (c) Fresh biomass yield of control and MsSPL8Ri plants. (d) Dry biomass yield of control and MsSPL8Ri plants. Values represent means  $\pm$  S.D. of three biological replicates and are analyzed by Student's t-test (\*  $P < 0.05$ , \*\*  $P < 0.01$ ).



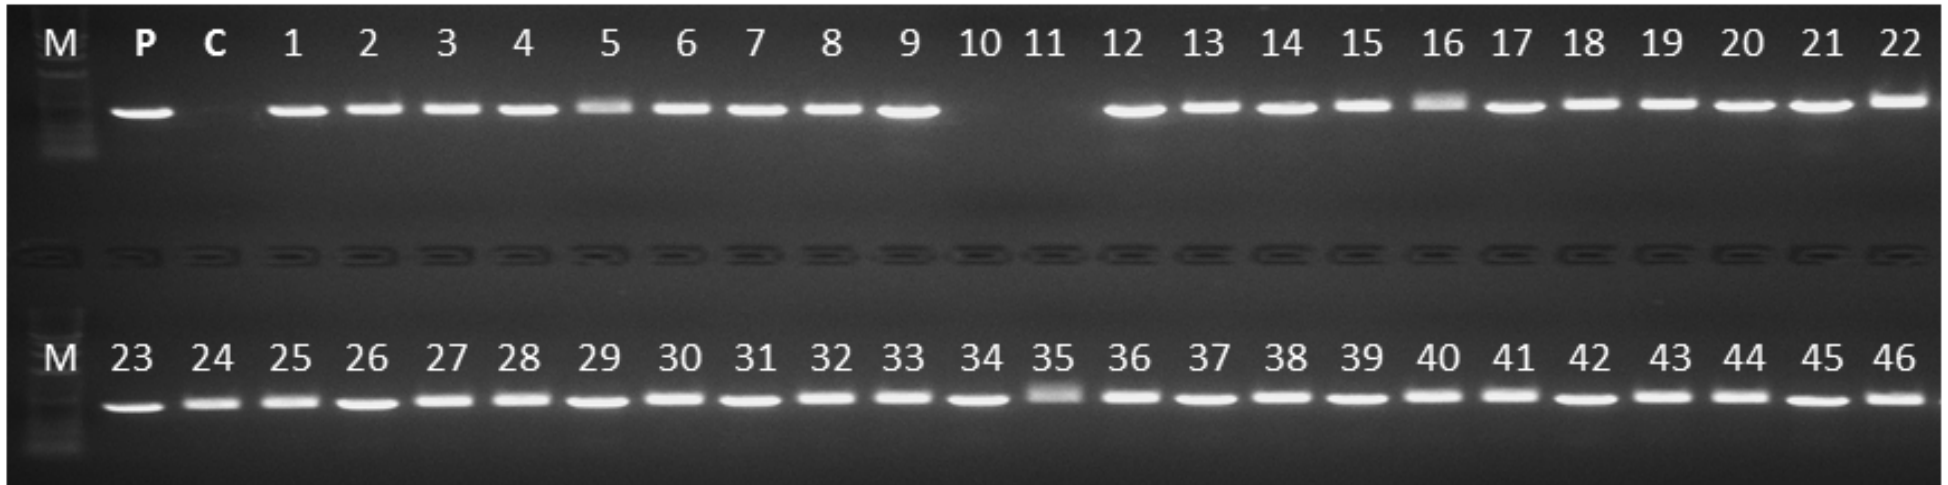

**Figure S13.** PCR analysis of regenerated alfalfa plants after *Agrobacterium*-mediated transformation with the *MsSPL8* overexpression vector. A pair of promoter and target gene-specific primers were used for PCR analysis, see Experimental procedures. C, wild-type control; M, PCR 50-2,000 bp marker (Sigma); P, plasmid DNA as positive control: Numbers represent individually regenerated plants.

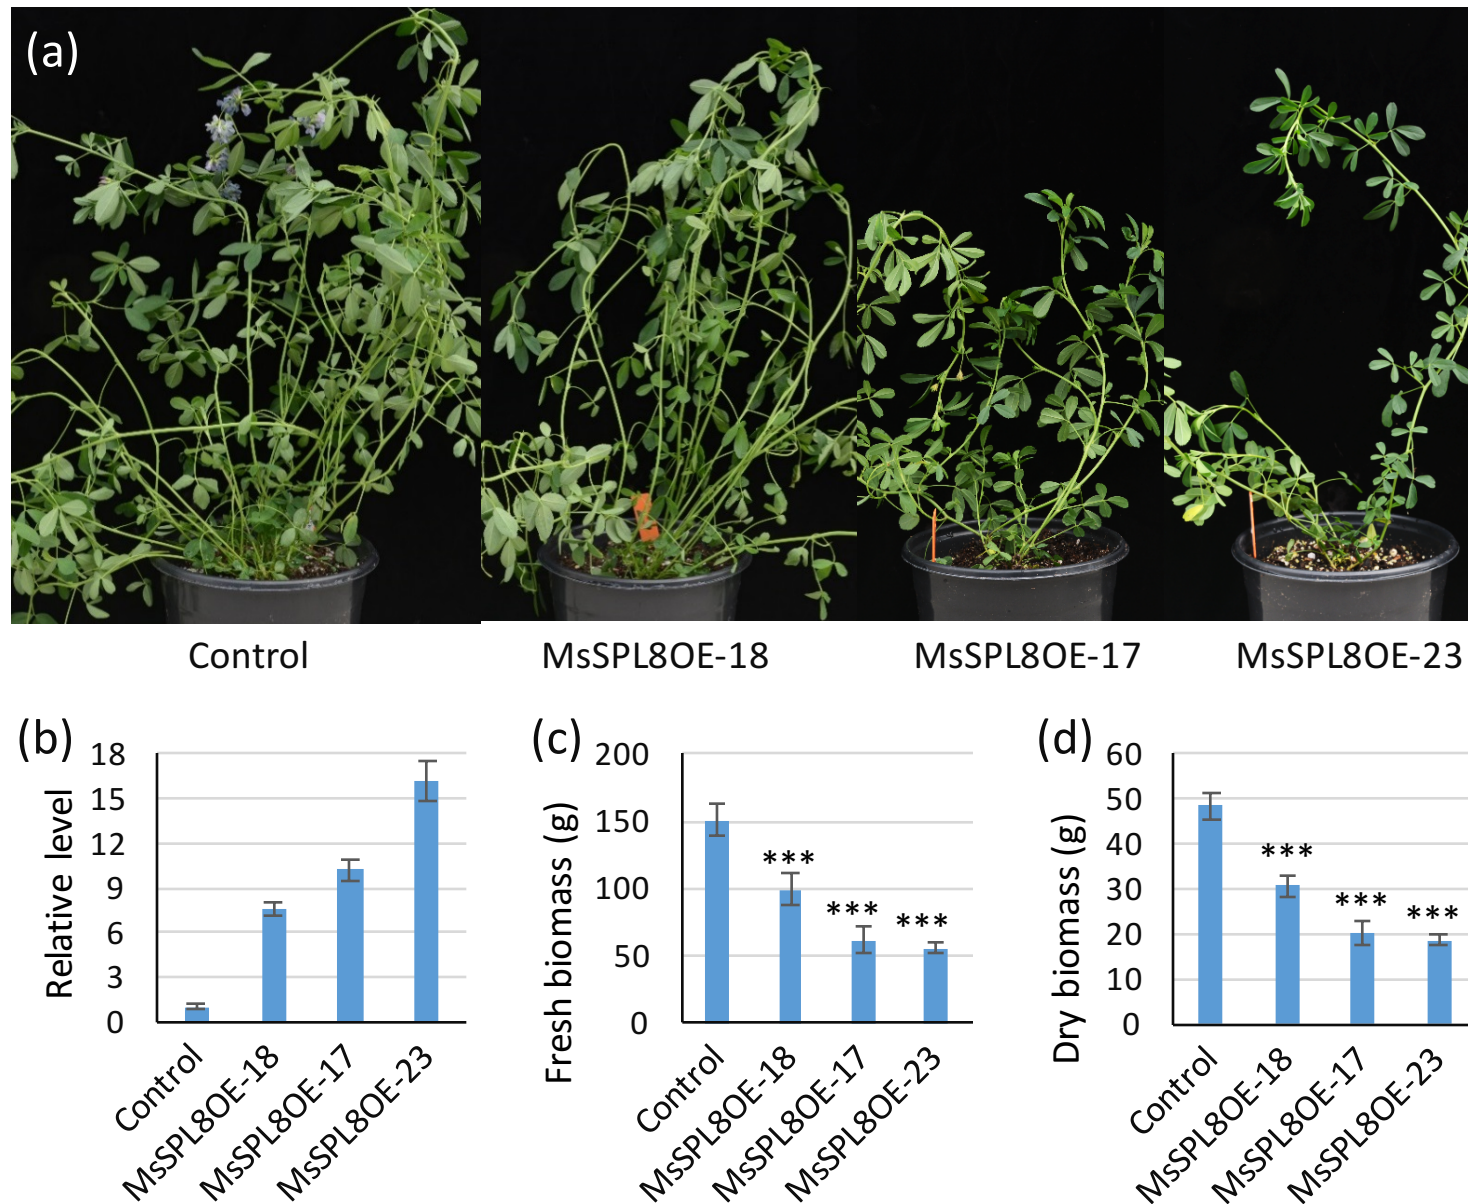

**Figure S14.** Transgenic alfalfa showing decreased biomass phenotype with overexpression of *MsSPL8*. (a) Mature plants of control and *MsSPL8* overexpression transgenics (SPL8OE). (b) *MsSPL8* relative expression levels. (c) Fresh biomass yield of control and *MsSPL8*OE plants. (d) Dry biomass yield of control and *MsSPL8*OE plants. Values represent means  $\pm$  S.D. of three biological replicates and are analyzed by Student's t-test (\*\*\*)  $P < 0.001$ ).

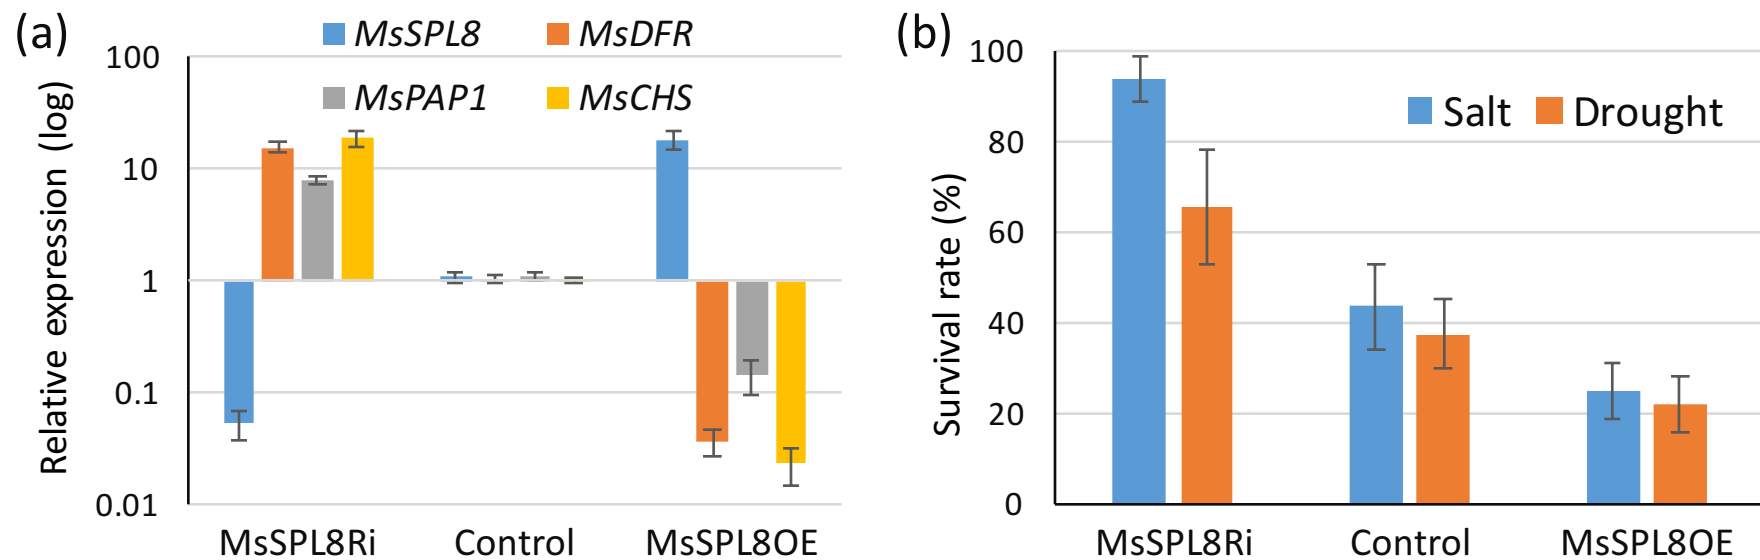

**Figure S15.** Effects of abiotic stresses on *MsSPL8* transgenic alfalfa plants. (a) Relative expression levels of *MsSPL8*, *MsCHS*, *MsPAP1* and *MsDFR* in different alfalfa lines. (b) Survival rate after salt and drought treatments. Values represent mean  $\pm$  S.D. of four biological replicates.
